32. Teherani A, Martimianakis T, Stenfors-Hayes T, Wadhwa A, Varpio L: Choosing a qualitative research approach. *J Grad Med Educ* 2015; 7:669–70
33. Paradis E, O'Brien B, Nimmon L, Bandiera G, Martimianakis MA: Design: Selection of data collection methods. *J Grad Med Educ* 2016; 8:263–4
34. Seidman I: *Interviewing as Qualitative Research: A Guide for Researchers in Education and the Social Sciences*, 3rd edition. New York, Teachers College Press, 2006
35. Krueger R, Casey M: *Focus Groups: A Practical Guide for Applied Research*. Thousand Oaks, Sage Publications, 2009
36. Marshall MN: Sampling for qualitative research. *Fam Pract* 1996; 13:522–5
37. Sandelowski M: Real qualitative researchers do not count: The use of numbers in qualitative research. *Res Nurs Health* 2001; 24:230–40
38. Lingard L, Driessen E: How to tell compelling scientific stories: Tips for artful use of the research manuscript and presentation genres. *Research Medical Education*. Edited by Cleland J, Durning SJ. Chichester, John Wiley & Sons, Ltd, 2015, pp 259–68

## ANESTHESIOLOGY REFLECTIONS FROM THE WOOD LIBRARY-MUSEUM

# Chloroform, Ether, or Nitrous Oxide at Night? Light for Liberty from F. T. Grimes, M.D., D.D.S.

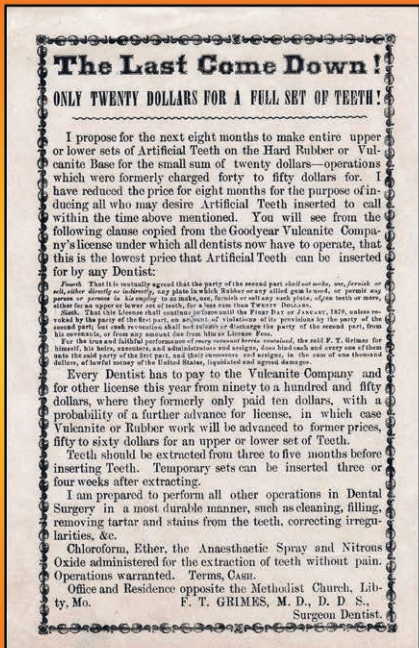

**The Last Come Down!**  
ONLY TWENTY DOLLARS FOR A FULL SET OF TEETH!

I propose for the next eight months to make entire upper or lower sets of Artificial Teeth on the Hard Rubber or Vulcanite Base for the small sum of twenty dollars—operations which were formerly charged forty to fifty dollars for. I have reduced the price for eight months for the purpose of inducing all who may desire Artificial Teeth inserted to call within the time above mentioned. You will see from the following clause copied from the Goodyear Vulcanite Company's license under which all dentists now have to operate, that this is the lowest price that Artificial Teeth can be inserted for by any Dentist:

*Fourth.* That this license shall not be assigned or transferred by the party of the second part, nor shall it be used, either directly or indirectly, as a basis for any other claim to work, or permit any person or persons to do any work, for a term less than Twenty Dollars.

*Fifth.* That this license shall not be assigned or transferred by the party of the second part, nor shall it be used, either directly or indirectly, as a basis for any other claim to work, or permit any person or persons to do any work, for a term less than Twenty Dollars.

Every Dentist has to pay to the Vulcanite Company and for other license this year from ninety to a hundred and fifty dollars, where they formerly only paid ten dollars, with a probability of a further advance for license, in which case Vulcanite or Rubber work will be advanced to former prices, fifty to sixty dollars for an upper or lower set of Teeth.

Teeth should be extracted from three to five months before inserting Teeth. Temporary sets can be inserted three or four weeks after extracting.

I am prepared to perform all other operations in Dental Surgery in a most durable manner, such as cleaning, filling, removing tartar and stains from the teeth, correcting irregularities, &c.

Chloroform, Ether, the Anaesthetic Spray and Nitrous Oxide administered for the extraction of teeth without pain. Operations warranted. Terms, Cash.

Office and Residence opposite the Methodist Church, Liberty, Mo. F. T. GRIMES, M. D., D. D. S., Surgeon Dentist.



Chloroform, Ether, the Anaesthetic Spray and Nitrous Oxide administered for the extraction of teeth without pain. Operations warranted. Terms, Cash.

Office and Residence opposite the Methodist Church, Liberty, Mo. F. T. GRIMES, M. D., D. D. S., Surgeon Dentist.

Filed by its inventor, Dr. Franklin T. Grimes of Liberty in Clay County, Missouri, United States Patent 110648 was granted in January of 1871 for his “Improvement in lamps.” The patent diagram (*upper right*) features an oil reservoir and a wick lamp. As a dental advertising broadside (*left*) spells out, “Chloroform, Ether...and Nitrous Oxide” (*lower right*) could now be administered more readily during the evenings, courtesy of lamps patented by Dr. Grimes. Yes, even explosive ether was administered around Grimes patented lamps. (Copyright © the American Society of Anesthesiologists’ Wood Library-Museum of Anesthesiology.)

George S. Bause, M.D., M.P.H., *Honorary Curator and Laureate of the History of Anesthesia, Wood Library-Museum of Anesthesiology, Schaumburg, Illinois, and Clinical Associate Professor, Case Western Reserve University, Cleveland, Ohio.* [UJYC@aol.com](mailto:UJYC@aol.com).
